## Isoflurane sedation in patients undergoing VA-ECMO treatment for cardiogenic shock – an observational propensity-matched study

C. Scherer<sup>1</sup>, D. Kupka<sup>1</sup>, T. Stocker<sup>1</sup>, D. Joskowiak<sup>2</sup>, H. Scheuplein<sup>1</sup>, C. Schoenegger<sup>1</sup>, C. Stremmel<sup>1</sup>, E. Luesebrink<sup>1</sup>, K. Stark<sup>1</sup>, M. Orban<sup>1</sup>, S. Peterss<sup>2</sup>, J. Hausleiter<sup>1</sup>, C. Hagl<sup>2</sup>, S. Massberg<sup>1</sup>, M. Orban<sup>1</sup>

<sup>1</sup>Ludwig-Maximilians University, Department of Cardiology, Munich, Germany; <sup>2</sup>Ludwig-Maximilians University, Department of Cardiac Surgery, Munich, Germany

**Funding Acknowledgement:** Type of funding source: None

**Introduction:** The feasibility and hemodynamic effects of isoflurane sedation in cardiogenic shock in the presence of extracorporeal membrane oxygenation (VA-ECMO) treatment is currently unknown.

**Methods:** Thirty-two cardiogenic shock patients with VA-ECMO treatment under sedation with volatile isoflurane on a cardiac intensive care unit have been enrolled in this retrospective single-center study and were matched by propensity score in a 1:1 ratio with intravenously (IV) sedated patients.

**Results:** Administration of isoflurane was associated with lower IV sedative drug use during VA-ECMO treatment (86% vs. 32%,  $p=0.01$ ). Mean systolic arterial pressure was similar ( $94.3 \pm 12.6$  mmHg versus  $92.9 \pm 10.5$

mmHg,  $p=0.65$ ), but mean heart rate was significantly higher in the conventional sedation group, when compared to the isoflurane group ( $85.2 \pm 20.5$  / min vs.  $74.7 \pm 15.0$  /min;  $p=0.02$ ). Catecholamine doses, VA-ECMO blood and gas flow, ventilation time ( $304 \pm 143$  h vs.  $398 \pm 272$  h,  $p=0.16$ ), bleeding complications BARC3a or higher (59.3% vs. 65.3%,  $p=0.76$ ) and 30-day mortality (59.2% vs. 63.4%,  $p=0.80$ ) were similar in both groups.

**Conclusions:** Volatile sedation with isoflurane is feasible in patients with cardiogenic shock and VA-ECMO treatment and was not associated with higher catecholamine dosage or ECMO flow rate compared to IV sedation.

CPC score on ICU discharge

| CPC score | Conventional (n) | Isoflurane (n) |
|-----------|------------------|----------------|
| CPC1      | 2                | 1              |
| CPC2      | 2                | 1              |
| CPC3      | 8                | 7              |
| CPC4      | 3                | 4              |
| CPC5      | 17               | 19             |

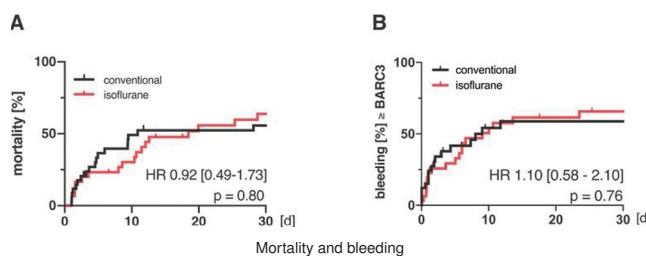

Source: http://academic.oup.com/eurheartj/article-pdf/41/Supplement_2/ehaa946.1839/34520257/ehaa946.1839.pdf
